# Supplementary material
Source: publisher site journal article supplement (https://neobiota.pensoft.net/article/23398/download/suppl/36/)
Supplement: Supplementary file 1

Supplementary File 6. Stochastic population growth for alternative seed bank scenarios

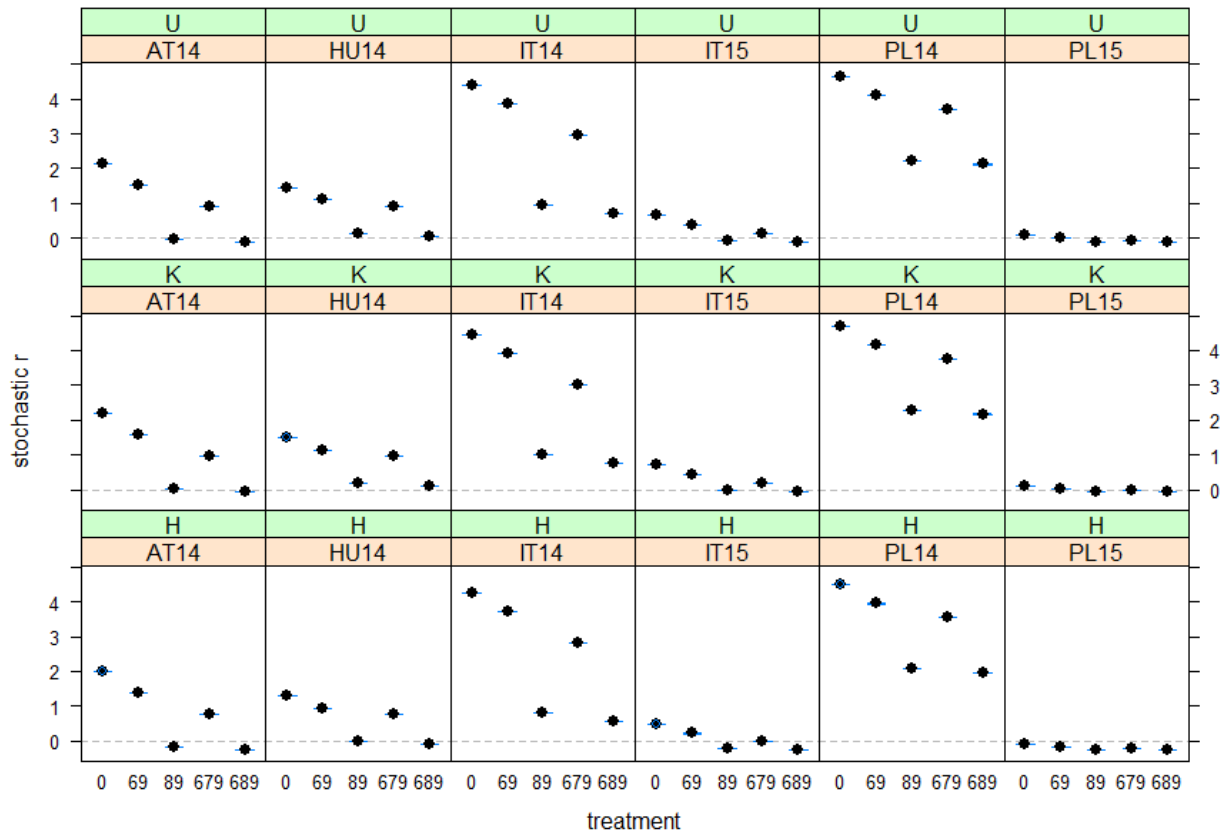

Fig. S11. Stochastic intrinsic growth  $r_s$  per reference data set (AT14, HU14, IT14, IT15, PL14, PL15) and per seed survival scenario (H, K, U), showing that patterns of mowing treatment effects are similar across reference populations and seed bank scenarios, but absolute values of  $r_s$  vary with both.
